# Supplementary material for: Intratumoral Copper Modulates PD-L1 Expression and Influences Tumor Immune Evasion
Source: Oxford University Press journal article supplement (doi:10.1158/0008-5472.can-20-0471), 2020-08-18
Supplement: 00085472can200471-sup-237207_3_supp_6440135_qdsn2d.docx [file 00085472can200471-sup-237207_3_supp_6440135_qdsn2d.docx]

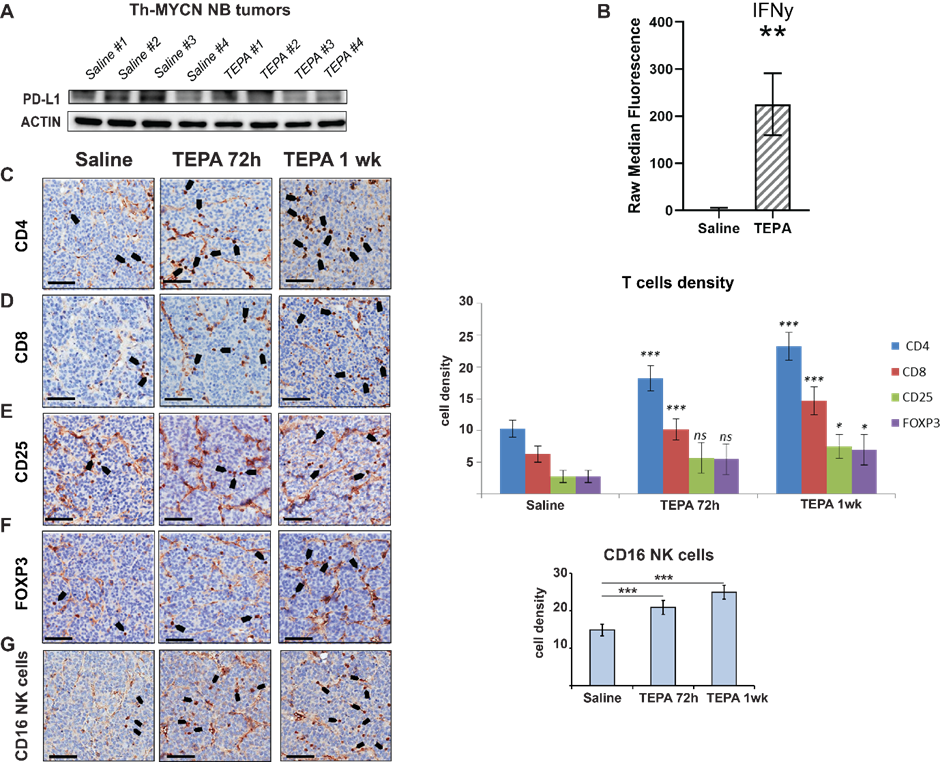


**Supplementary Figure S4. A**,*Ex vivo* analysis for PD-L1 expression from tumors dissected from *Th-MYCN* mice (n=4 per group) treated with TEPA (400mg/kg/day) for seven days. **B**, Level of IFNg in the sera of mice treated with TEPA for one week expressed as raw median fluorescence (n=4). Immunohistochemistry staining in NB tumor slices for **C**, CD4, **D**, CD8, **E**, CD25, **F**, FOXP3, **G**, CD16 dissected from *Th-MYCN* mice treated with TEPA (400mg/kg/day) for 72h and seven days. Images are representative of 4 mice for saline control group and 6 mice for each treatment time-point. Black bars represent 60µm. Cell density bar graphs (on the right) of CD4/CD8/CD16/ and T-reg CD25/FOXP3 positive cells expressed as number of cells/field with a field size of 0.1mm2. (* p<0.05; ** p<0.01; *** p<0.001).
