# Supplementary material for: Intratumoral Copper Modulates PD-L1 Expression and Influences Tumor Immune Evasion
Source: Oxford University Press journal article supplement (doi:10.1158/0008-5472.can-20-0471), 2020-08-18
Supplement: 00085472can200471-sup-237207_3_supp_6440136_qdsn2d.docx [file 00085472can200471-sup-237207_3_supp_6440136_qdsn2d.docx]

**
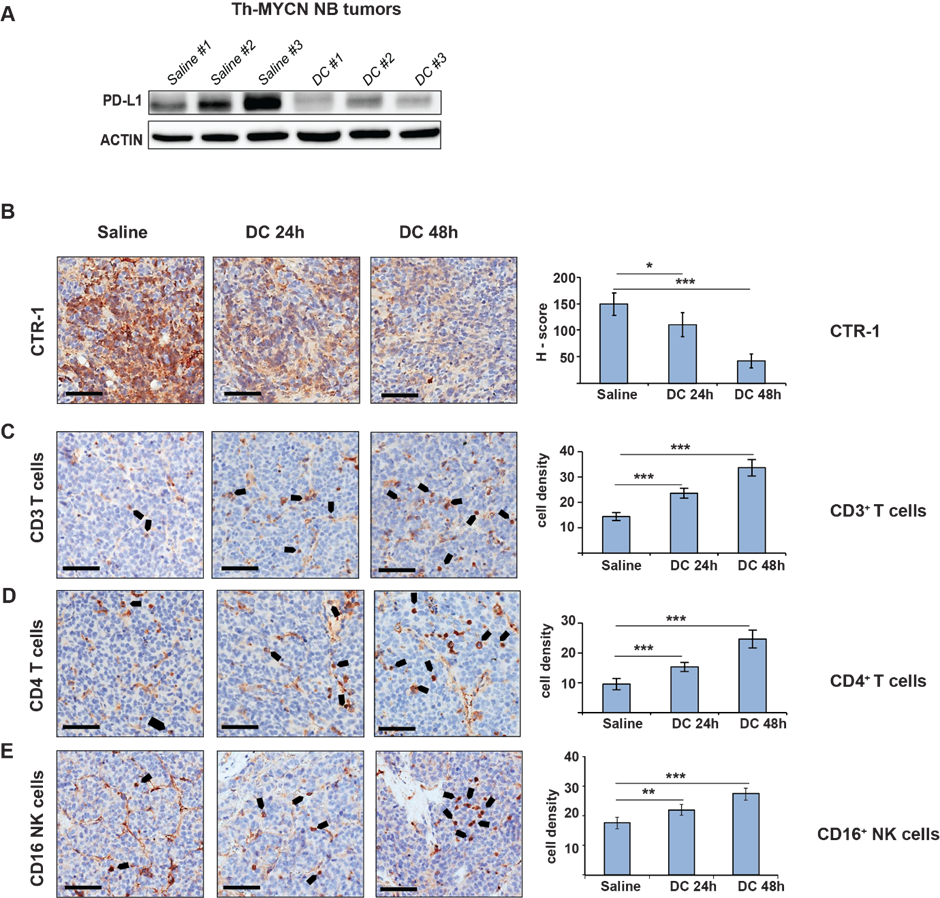
**

**Supplementary Figure S5. A**, *Ex vivo* analysis for PD-L1 expression from tumors dissected from *Th-MYCN* mice (n=3 each group) treated with DC (300 µg/mL) for 48h. **B**, Immunohistochemistry staining in NB tumor slices for CTR-1, **C**, CD3, **D**, CD4, **E**, CD16 dissected from *Th-MYCN* mice treated with DC (300 µg/mL) for 24h or 48h. Images are representative of 4 mice for saline control group and 6 mice for each treatment time-point. Black bars represent 60µm. The bar graphs (on the right) show CTR-1 H-score or CD3/CD4/CD16 cell density (* p<0.05; ** p<0.01; *** p<0.001). Cell density expressed as number of cells/field, with a field size of 0.1mm2.
