# Supplementary material for: Intratumoral Copper Modulates PD-L1 Expression and Influences Tumor Immune Evasion
Source: Oxford University Press journal article supplement (doi:10.1158/0008-5472.can-20-0471), 2020-08-18
Supplement: 00085472can200471-sup-237207_3_supp_6440138_qdsn2d.docx [file 00085472can200471-sup-237207_3_supp_6440138_qdsn2d.docx]

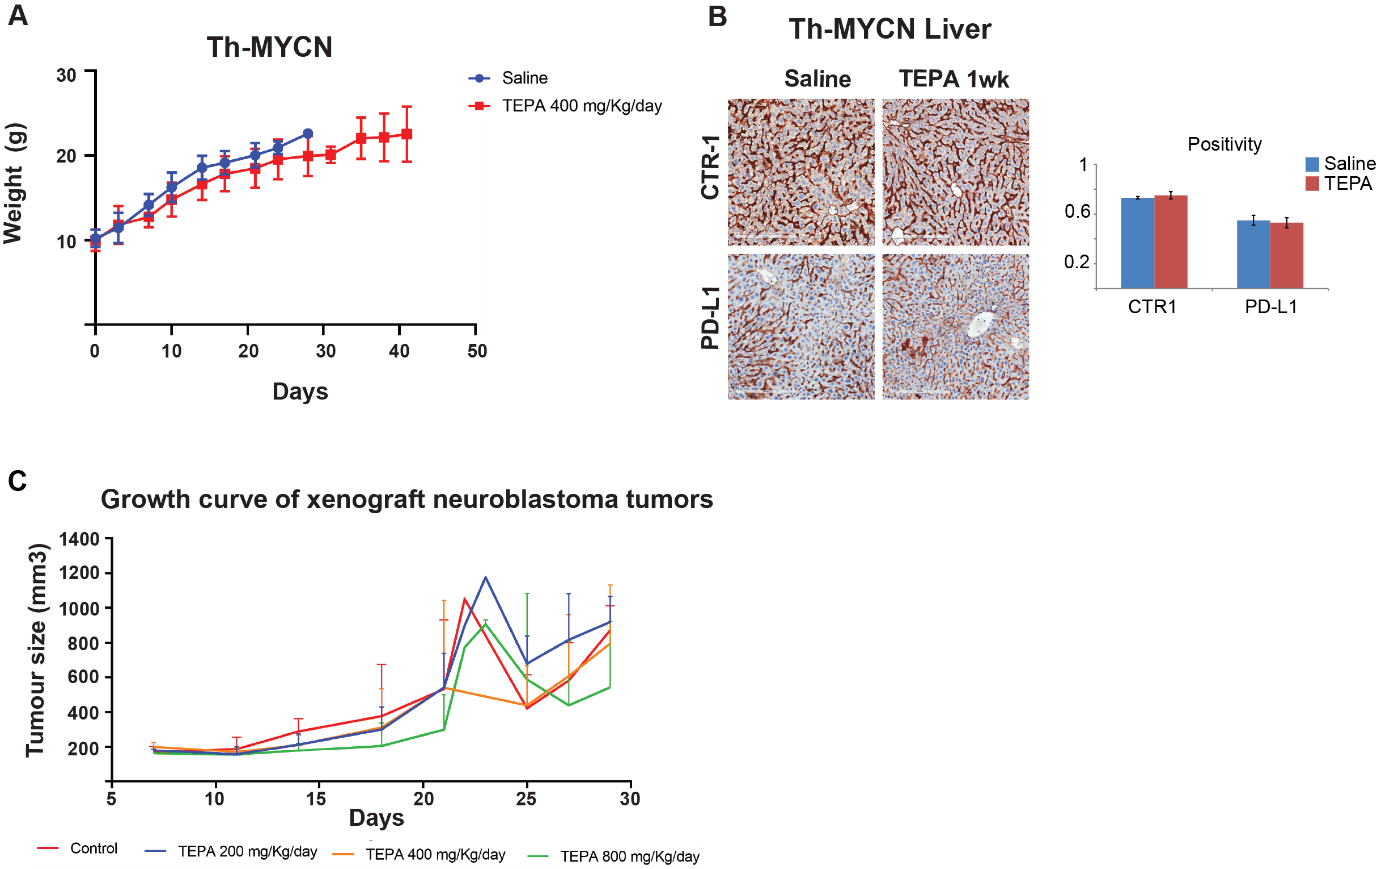


**Supplementary Figure S7. A**, Mouse weight in *Th-MYCN* mouse model (n=7, used for mouse survival) treated with saline control (blue line) or with TEPA 400mg/kg/day (red line). **B**, Immunohistochemistry staining for CTR-1 and PD-L1 in the liver of neuroblastoma Th-MYCN mice treated with the copper chelation agents TEPA. **C**, Growth of NB SK-N-BE(2)-C tumors xenografted into immunocompromised BALB/c-Fox1nu/Ausb (n=4 mice per group) treated with saline control (red line), or TEPA at doses of 200mg/kg/day (blue line), 400mg/kg/day (orange line) or 800mg/kg/day (green line).
