# Supplementary material for: Intratumoral Copper Modulates PD-L1 Expression and Influences Tumor Immune Evasion
Source: Oxford University Press journal article supplement (doi:10.1158/0008-5472.can-20-0471), 2020-08-18
Supplement: 00085472can200471-sup-237207_3_supp_6440141_qdsn2d.docx [file 00085472can200471-sup-237207_3_supp_6440141_qdsn2d.docx]

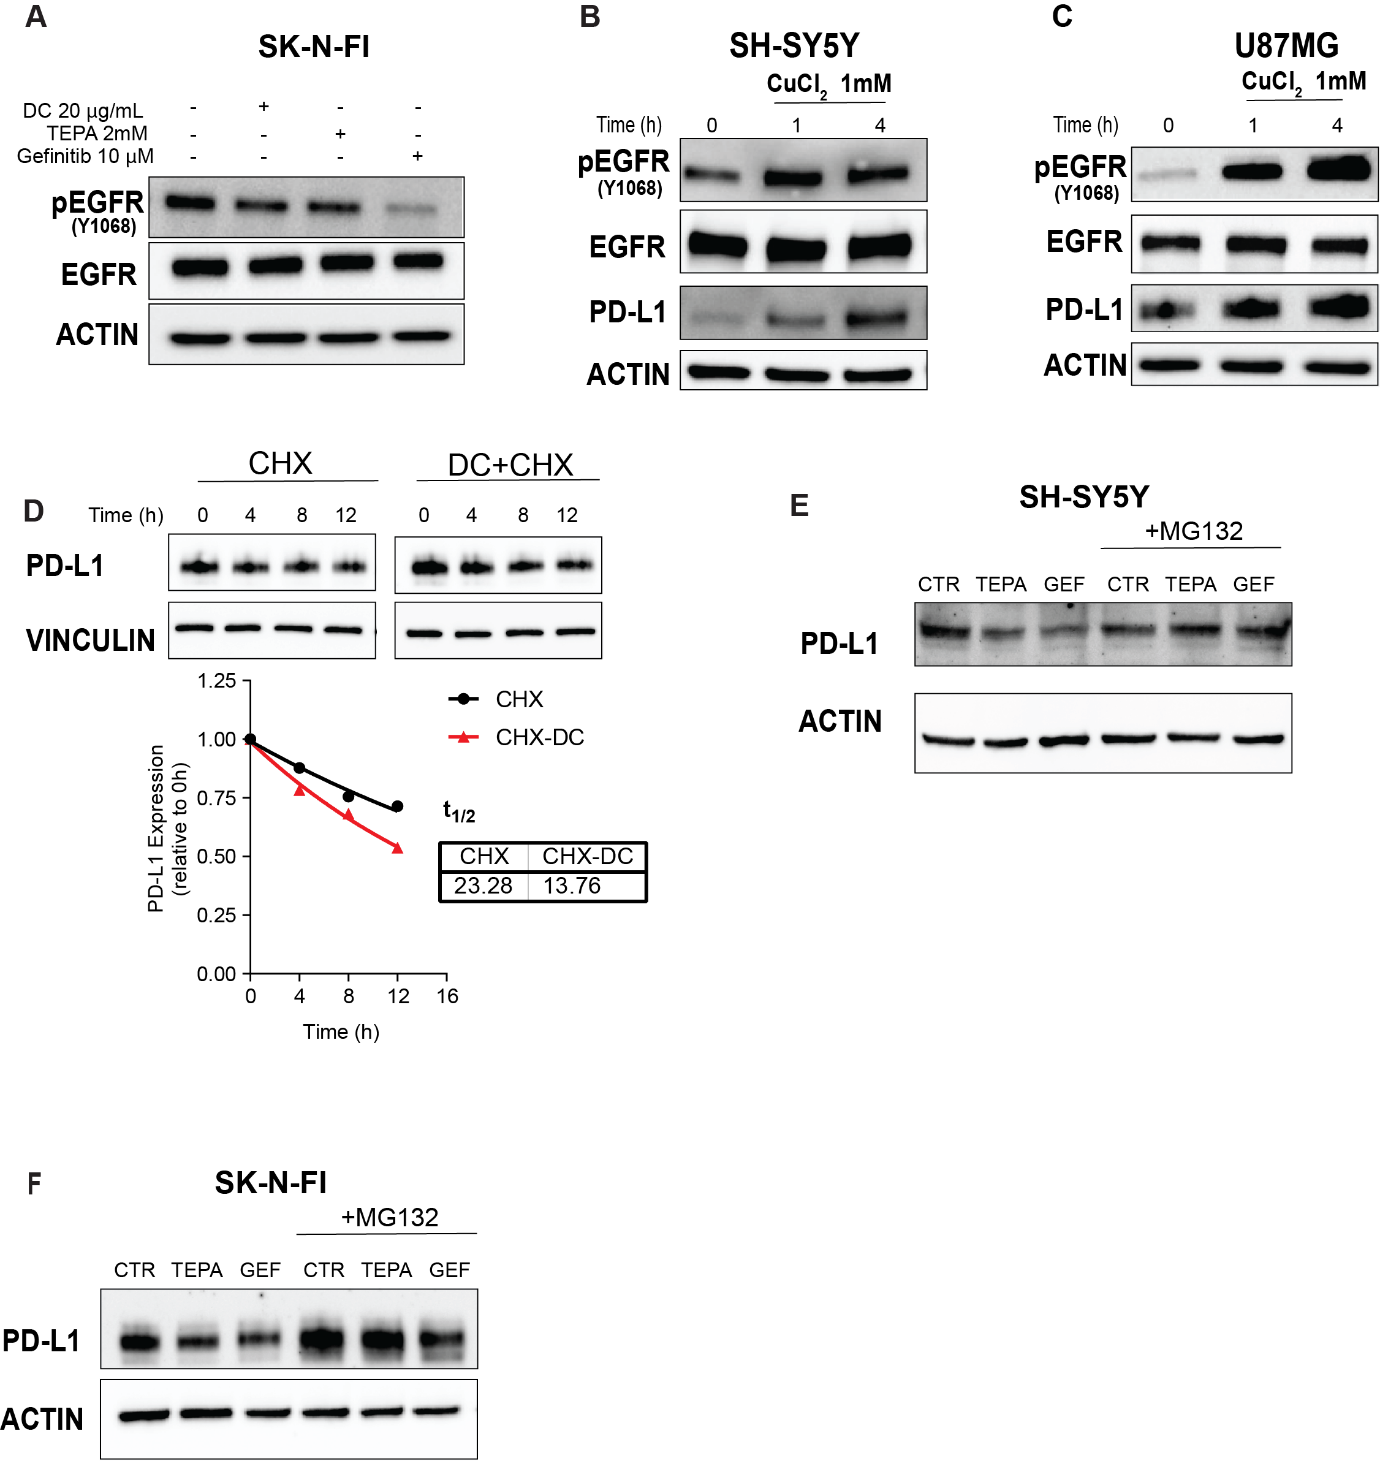


**Supplementary Figure S3. A**, Western blot of phospho-EGFR (Y1068) and EGFR in SK-N-FI treated with DC, TEPA or Gefitinib at 24h. **B, and C,** Expression of phospho-EGFR (Y1068), EGFR and PD-L1 in SH-SY5Y and U87MG cells treated with CuCl2 (1mM) for 1h or 4h. **D**, PD-L1 half-lifein cells pre-treated with DC 20µg/ml for 12 h and with 200 µg/ml of cycloheximide (CHX) for 2, 4, 8 and 12 h. **E, and F,** PD-L1 rescue experiments: 2h pre-treatment with the proteasome inhibitor MG132 blocked the degradation of PD-L1 induced by TEPA and Gefitinib.
