# Supplementary material for: Intratumoral Copper Modulates PD-L1 Expression and Influences Tumor Immune Evasion
Source: Oxford University Press journal article supplement (doi:10.1158/0008-5472.can-20-0471), 2020-08-18
Supplement: 00085472can200471-sup-237207_3_supp_6440146_qdsn2d.docx [file 00085472can200471-sup-237207_3_supp_6440146_qdsn2d.docx]

**Master Regulator Analysis**

Gene-regulatory network inference from expression data has become a valuable method to describe transcriptional relationships characterizing a well-defined phenotypic state (1). It has been shown that transcriptional events behind complex cellular processes can be explained by the action of relatively few transcription factors, termed as Master Regulators (2). The identification of most influencing factors driving a determined phenotypic state by inferring them from a gene-regulatory network is known as Master Regulator Analysis (MRA) (3-4). In this study, MRA was performed by comparing interferon treated samples, in the presence of TEPA and interferon only treated cells with the mra algorithm included in the corto R package (5), using default parameters and a neuroblastoma co-expression network. Before MRA, VST-normalized genes whose expression showed a variance less than 0.01 throughout the dataset were filtered out from the analysis (6). The neuroblastoma network was generated by applying the corto algorithm to the high-risk neuroblastoma RNA-seq dataset from the TARGET Project (7) using a list of 1191 unique transcriptional regulators.

**References**

1. Mercatelli D, Scalambra L, Triboli L, Ray F, Giorgi FM. Gene regulatory network inference resources: A practical overview. Biochim Biophys Acta Gene Regul Mech. 2020;1863(6):194430. doi:10.1016/j.bbagrm.2019.194430

2. Giorgi FM, Lopez G, Woo JH, Bisikirska B, Califano A, Bansal M. Inferring protein modulation from gene expression data using conditional mutual information. PLoS One. 2014;9(10):e109569. doi:10.1371/journal.pone.0109569

3.Tovar H, García-Herrera R, Espinal-Enríquez J, Hernández-Lemus E. Transcriptional master regulator analysis in breast cancer genetic networks. Comput Biol Chem. 2015;59 Pt B:67‐77. doi:10.1016/j.compbiolchem.2015.08.007

4. Guzzi PH, Mercatelli D, Ceraolo C, Giorgi FM. Master Regulator Analysis of the SARS-CoV-2/Human Interactome. J Clin Med. 2020;9(4):982. doi:10.3390/jcm9040982

5. Mercatelli D, Lopez-Garcia G, Giorgi FM. corto: a lightweight R package for Gene Network Inference and Master Regulator Analysis. Bioinformatics. 2020;btaa223. doi:10.1093/bioinformatics/btaa223

6. Giorgi FM, Del Fabbro C, Licausi F. Comparative study of RNA-seq- and microarray-derived coexpression networks in Arabidopsis thaliana. Bioinformatics. 2013;29(6):717‐724. doi:10.1093/bioinformatics/btt053

7. Pugh TJ, Morozova O, Attiyeh EF, et al. The genetic landscape of high-risk neuroblastoma. Nat Genet. 2013;45(3):279‐284. doi:10.1038/ng.2529
